# Supplementary material for: Increasing HPV Vaccination Uptake among Adolescents: A Systematic Review
Source: Int J Environ Res Public Health. 2020 Oct 30;17(21):7997. doi: 10.3390/ijerph17217997 (PMC7663345; doi:10.3390/ijerph17217997)
Supplement: Supplementary file 1 [file ijerph-17-07997-s001.pdf]

**Table S1.** Characteristics of the included studies and references.

| Author,<br>Year,<br>Country       | Study Title                                                                                                                                                                         | Study<br>design | HPVv<br>Data<br>collection | Study<br>size | Vaccinatio<br>n target<br>age | Strategy<br>target | Description of<br>intervention                                                                                                                                                                                                                                                                                                                    | Intervention<br>category  | Outcome                                       | Proven efficacy (N/Y)<br>Main results                                                                                       |
|-----------------------------------|-------------------------------------------------------------------------------------------------------------------------------------------------------------------------------------|-----------------|----------------------------|---------------|-------------------------------|--------------------|---------------------------------------------------------------------------------------------------------------------------------------------------------------------------------------------------------------------------------------------------------------------------------------------------------------------------------------------------|---------------------------|-----------------------------------------------|-----------------------------------------------------------------------------------------------------------------------------|
| Bundy<br>D.G.,<br>2013 (1)<br>USA | Improving<br>immunization<br>delivery using an<br>electronic health<br>record: the improve<br>project                                                                               | RCT             | Registries                 | Nr            | 13–14                         | HCPs               | An electronic alert plus a<br>periodic report on all<br>adolescents late for<br>vaccination for HCPs                                                                                                                                                                                                                                              | Multicompo<br>nent        | All-doses<br>completi<br>on                   | N                                                                                                                           |
| Cassidy<br>B., 2014<br>(2)<br>USA | A quality<br>improvement<br>initiative to increase<br>HPV vaccine rates<br>using an educational<br>and reminder<br>strategy for parents of<br>preteen girls.                        | Q-E             | Registries                 | 53            | 11–12                         | A/P                | Informative materials<br>based on the HBM in<br>addition to a telephonic<br>reminder                                                                                                                                                                                                                                                              | Multicompo<br>nent        | First<br>dose;<br>all-doses<br>completi<br>on | Y<br>First dose uptake OR<br>= 9.43 (95% CI 2.69–<br>33.10); all doses<br>completion OR =<br>22.50 (95% CI 4.29–<br>117.99) |
| Cates<br>J.R., 2011<br>(3)<br>USA | Evaluating a county-<br>sponsored social<br>marketing campaign<br>to increase mothers'<br>information on HPV<br>vaccine for their<br>preteen daughters in<br>a primarily rural area | C-S             | Registries                 | 225           | 9–8                           | A/P;<br>HCPs       | Social marketing<br>campaign including<br>information on different<br>aspects: product<br>(recommend vaccine<br>against HPV), price (cost,<br>perception of safety and<br>efficacy, and access),<br>promotion (posters,<br>brochures, website, news<br>releases, doctor's<br>recommendation), and<br>place (doctors' offices,<br>retail outlets). | Education/In<br>formation | Not<br>specified                              | N                                                                                                                           |

|                          |                                                                                                                                                   |     |               |         |       |           |                                                                                                                                                                                                                                                                           |                       |                                  |                                                                                                                                                        |
|--------------------------|---------------------------------------------------------------------------------------------------------------------------------------------------|-----|---------------|---------|-------|-----------|---------------------------------------------------------------------------------------------------------------------------------------------------------------------------------------------------------------------------------------------------------------------------|-----------------------|----------------------------------|--------------------------------------------------------------------------------------------------------------------------------------------------------|
| Cates J.R., 2014 (4) USA | Intervention effects from a social marketing campaign to promote HPV vaccination in preteen boys                                                  | Q-E | Registries    | 25,869  | 11–12 | A/P; HCPs | Social marketing campaign including: product (recommend vaccine against HPV), price (cost, perception of safety and efficacy, and access), promotion (posters, brochures, website, news releases, doctor's recommendation), and place (doctors' offices, retail outlets). | Education/Information | First dose                       | Y<br>Gender specific HR = 1.34 ( $p = 0.002$ ) for M and HR = 1.09 ( $p = 0.320$ ) for F                                                               |
| Cates J.R., 2018 (5) USA | Immunization effects of a communication intervention to promote preteen HPV vaccination in primary care practices                                 | Q-E | Registries    | 147,294 | 11–13 | A/P; HCPs | Focus groups with providers, parents, and preteens, an online training about vaccine epidemiology, communicating with parents and preteens about HPV and HPV vaccine for providers, information materials exposed in clinics for patients                                 | Education/Information | First dose; all-doses completion | Y<br>First dose uptake HR = 1.17 (95% CI 1.1, 1.26); all doses completion HR 1.18 (95% CI 1.07, 1.31)                                                  |
| Choi N., 2017 (6) USA    | Successful use of Interventions in combination to improve Human Papillomavirus Vaccination coverage rates among adolescents-Chicago, 2013 to 2015 | Q-E | Self-reported | Nr      | 13–17 | A/P; HCPs | Five interventions targeting the public, clinicians, and their staff (1. developing a jurisdiction-wide collaborative initiative with stakeholders; 2. implementing education and skill-building strategies targeting providers; 3. conducting                            | Multicomponent        | First dose; all-doses completion | Y<br>Pre-post data AFIX: first dose uptake increased by a mean of 11% (range, 1%–30%); All doses completion increased by a mean of 7% (range, 1%–30%). |

|                             |                                                                                                                                                        |    |               |        |       |           |                                                                                                                                                                                                                                    |                |                                  |                                                                                                                                                                                                                                                                                                                        |
|-----------------------------|--------------------------------------------------------------------------------------------------------------------------------------------------------|----|---------------|--------|-------|-----------|------------------------------------------------------------------------------------------------------------------------------------------------------------------------------------------------------------------------------------|----------------|----------------------------------|------------------------------------------------------------------------------------------------------------------------------------------------------------------------------------------------------------------------------------------------------------------------------------------------------------------------|
|                             |                                                                                                                                                        |    |               |        |       |           | AFIX enhanced with individualized clinician-to-clinician feedback; 4. implementing IIS-based recall; 5. conducting a comprehensive communication campaign targeting the public)                                                    |                |                                  | All interventions: first dose uptake increased by a mean of 20.5% and all doses completion by a mean of 16.1%                                                                                                                                                                                                          |
| Farmar A.L.M., 2016 (7) USA | Achieving high adolescent HPV vaccination coverage                                                                                                     | CS | Registries    | 11,463 | 13–17 | A/P; HCPs | Offering HPV vaccination in bundle with Tdap, MCV4 to all subjects attending a medical visit, internally developed immunization registry <sup>20</sup> (VaxTrax) with standing orders/reminder before any visits, in Denver Health | Multicomponent | First dose; all-doses completion | Y<br>Gender-specific Compared to national data First dose +32.5% for F and +54.7% for M; All-doses completion +28.4% for F and +38.6% for M (significant 95% CI)                                                                                                                                                       |
| Fujiwara H., 2013 (8) Japan | Community-based interventions to improve HPV vaccination coverage among 13- to 15-year-old females: measures implemented by local governments in Japan | CS | Self-reported | 810    | 13–16 | A/P       | Several different combinations of the following strategies: school-based strategies, economic incentives, reminders                                                                                                                | Multicomponent | First dose; all-doses completion | Y<br>First dose uptake ranged from 45.7% for SUB to 74.7% for SUB/DM ( $p < 0.001$ ); from 81.4% for SUB/FT/RC to 95% for SUB/FT/DM/RC ( $p < 0.001$ ); from 95% for SUB/FT/DM/RC to 96.8% for SUB/school based ( $p < 0.001$ ) All doses completion from 3.1% for SUB to 17.6% for SUB/DM ( $p < 0.001$ ); from 73.6% |

|                          |                                                                                            |     |            |         |       |      |                                                              |                |                                  |                                                                                                                                                                                                                                                                                  |
|--------------------------|--------------------------------------------------------------------------------------------|-----|------------|---------|-------|------|--------------------------------------------------------------|----------------|----------------------------------|----------------------------------------------------------------------------------------------------------------------------------------------------------------------------------------------------------------------------------------------------------------------------------|
|                          |                                                                                            |     |            |         |       |      |                                                              |                |                                  | for SUB/FT/RC to 90.1% for SUB/FT/DM/RC ( $p < 0.001$ ); from 90.1% for SUB/FT/DM/RC to 91.2% for SUB/school based (ns) School-based vaccination program with subsidy achieved the highest coverage (96.8% for the 1st dose, 96.2% for the 2nd dose, and 91.2% for the 3rd dose) |
|                          |                                                                                            |     |            |         |       |      |                                                              |                |                                  | Y/N                                                                                                                                                                                                                                                                              |
|                          |                                                                                            |     |            |         |       |      |                                                              |                |                                  | Age specific                                                                                                                                                                                                                                                                     |
|                          |                                                                                            |     |            |         |       |      |                                                              |                |                                  | Compared to control group                                                                                                                                                                                                                                                        |
|                          |                                                                                            |     |            |         |       |      |                                                              |                |                                  | First dose for 11-12yo +1.5 pp (+0.3 - +2.7) in person and +1.9 pp (+0.7 - +3.1) webinar; for 13-18yo +0.4 pp (ns) and -0.1 pp (ns) respectively.                                                                                                                                |
|                          |                                                                                            |     |            |         |       |      |                                                              |                |                                  | All doses completion for 11-12yo +0.1 pp (ns) in person and +0.2 pp (ns) webinar; for 13-18yo +0.7 pp (+0.1 - +1.3) and +0.5 pp (ns) respectively                                                                                                                                |
| Gilkey M.B, 2014 (9) USA | Increasing provision of adolescent vaccines in primary care: a randomized controlled trial | RCT | Registries | 107,443 | 11-18 | HCPs | In-person consultation and webinar according to AFIX program | Multicomponent | First dose; all-doses completion |                                                                                                                                                                                                                                                                                  |

|                                      |                                                                                                                                 |     |               |      |       |           |                                                                                                                                                                                                                                                    |                       |                                  |                                                                                                                 |
|--------------------------------------|---------------------------------------------------------------------------------------------------------------------------------|-----|---------------|------|-------|-----------|----------------------------------------------------------------------------------------------------------------------------------------------------------------------------------------------------------------------------------------------------|-----------------------|----------------------------------|-----------------------------------------------------------------------------------------------------------------|
| Grandahl M., 2016 (10)<br>Sweden     | School-based intervention for the prevention of HPV among adolescents: A cluster randomised controlled study                    | RCT | Self-reported | 741  | 16–19 | A/P       | Based on the HBM, school nurses delivered 30 min face-to-face structured information about HPV, including cancer risks and HPV prevention, by propagating condom use and HPV vaccination                                                           | Education/Information | First dose; all-doses completion | Y<br>+6.5 pp in the intervention group (52.5 % to 59%)<br>+0 pp in the control group stable at 60.9%            |
| Irving S. A., 2018 (11)<br>USA       | Human Papillomavirus vaccine coverage and prevalence of missed opportunities for vaccination in an integrated healthcare system | Q-E | Registries    | 150  | 11–17 | HCPs      | Boosting Recommended Adolescent Vaccination in Oregon' (BRAVO), consisting in 30-minute education session combining information on HPV infection, parental communication strategies, and feedback on clinic- and department-specific coverage data | Multicomponent        | First dose; all-doses completion | N                                                                                                               |
| Jacobs-Wingo J. L., 2017 (12)<br>USA | Human Papillomavirus Vaccine uptake: increase for American Indian adolescents, 2013-2015                                        | Q-E | Registries    | 6239 | 13–17 | A/P; HCPs | Analysis and feedback on vaccine coverage data, educating providers about HPV vaccine, expanding access to HPV vaccine, and establishing or expanding reminder recall and education efforts                                                        | Multicomponent        | First dose; all-doses completion | Y<br>First dose +24 pp (from 47 % pre to 71% post);<br>All doses completion +22 pp (from 20 % pre to 42 % post) |
| Kempe A., 2016 (13)<br>USA           | Parental choice of recall method for HPV vaccination: a pragmatic trial                                                         | RCT | Registries    | 374  | 11–17 | A/P       | Recalling adolescents late for HPV doses. On their choice, during the first-dose appointment, parents who wanted to receive reminders were                                                                                                         | Remind                | All-doses completion             | N<br>Completion rates higher with e-mail and telephone when compared to other                                   |

|                          |                                                                                                         |     |               |     |       |      |                                                                                                                                                                                                                                                                                                             |                       |                                  |                                                                                                                                                                                   |
|--------------------------|---------------------------------------------------------------------------------------------------------|-----|---------------|-----|-------|------|-------------------------------------------------------------------------------------------------------------------------------------------------------------------------------------------------------------------------------------------------------------------------------------------------------------|-----------------------|----------------------------------|-----------------------------------------------------------------------------------------------------------------------------------------------------------------------------------|
|                          |                                                                                                         |     |               |     |       |      | given a short check-off form clarifying (1) which recall method they preferred (text, e-mail, automated telephone message), (2) if they also wanted a recall sent to their child, and (3) the contact information for their preferred method. The number of recalls parents would receive was not specified |                       |                                  | methods (90% vs 60%. $p = 0.008$ )                                                                                                                                                |
|                          |                                                                                                         |     |               |     |       |      |                                                                                                                                                                                                                                                                                                             |                       |                                  | Y                                                                                                                                                                                 |
|                          |                                                                                                         |     |               |     |       |      |                                                                                                                                                                                                                                                                                                             |                       |                                  | Gender specific                                                                                                                                                                   |
|                          |                                                                                                         |     |               |     |       |      |                                                                                                                                                                                                                                                                                                             |                       |                                  | First dose uptake from 83.4% pre to 88.4% post ( $p = 0.02$ ) for M and from 89.8% pre to 91.5% post ( $p = 0.43$ ) for F;                                                        |
| Krantz L., 2018 (14) USA | Increasing HPV vaccination coverage through provider-based interventions                                | Q-E | Registries    | 105 | 13–17 | HCPs | Educational seminar and training on communication for HCPs, monthly feedback on vaccination rates to participating clinics, alert for HCPs at any visit for unvaccinated adolescents                                                                                                                        | Multicomponent        | First dose; all-doses completion | All doses completion from 50.9% pre to 61.7% post for all ( $p < 0.05$ ), from 42.6% pre to 57.3% post ( $p < 0.001$ ) for M and from 60.0% pre to 66.5% post, $p = 0.04$ ) for F |
| Lee H., 2018 (15) USA    | Using narrative intervention for HPV vaccine behavior change among Khmer mothers and daughters: a pilot | RCT | Self-reported | 19  | 14–17 | A/P  | A storytelling narrative intervention videos which focused on a series of HPV vaccination-related messages based on two theories: rNEM                                                                                                                                                                      | Education/Information | First dose                       | N                                                                                                                                                                                 |

|                                |                                                                                                                        |     |            |        |       |           |                                                                                                                                                      |                |                                  |                                                                                                                                                                                                                                             |                                                                                                                          |
|--------------------------------|------------------------------------------------------------------------------------------------------------------------|-----|------------|--------|-------|-----------|------------------------------------------------------------------------------------------------------------------------------------------------------|----------------|----------------------------------|---------------------------------------------------------------------------------------------------------------------------------------------------------------------------------------------------------------------------------------------|--------------------------------------------------------------------------------------------------------------------------|
|                                | RCT to examine feasibility, acceptability, and preliminary effectiveness                                               |     |            |        |       |           | and the Storytelling Narrative Communication theory                                                                                                  |                |                                  |                                                                                                                                                                                                                                             |                                                                                                                          |
|                                |                                                                                                                        |     |            |        |       |           |                                                                                                                                                      |                |                                  |                                                                                                                                                                                                                                             | Y                                                                                                                        |
| Mantzari E., 2015 (16) England | Financial incentives for increasing uptake of HPV vaccinations: a randomized controlled trial                          | RCT | Registries | 1000   | 16–18 | A/P       | Financial Incentives and remind intervention                                                                                                         | Multicomponent | First dose; all-doses completion | First dose uptake OR 1.63 (95% CI 1.08–2.47); previous non-attenders OR 2.65 (95%CI 1.61–4.38); All doses completion OR 2.15 (95%CI 1.32–3.50); previous non-attenders OR 4.28 (95% CI 1.92–9.55)                                           |                                                                                                                          |
|                                |                                                                                                                        |     |            |        |       |           |                                                                                                                                                      |                |                                  |                                                                                                                                                                                                                                             | Age-specific                                                                                                             |
| McLean H. Q., 2017 (17) USA    | Improving Human Papillomavirus vaccine use in an integrated health system: impact of a provider and staff intervention | Q-E | Registries | 16,041 | 11–17 | A/P; HCPs | In-person provider and staff education, quarterly feedback of vaccine coverage, and system-wide changes to patient reminder and recall notifications | Multicomponent | First dose; all-doses completion | First dose uptake for 11–12yo from pre 40.6% to 59.3% post in intervention group vs 31.9% pre to 44.5% post in the control group ( $p = .0001$ ). For 13-17yo from 53.0% pre to 61.7% post vs from 48.4% pre to 55.4% post ( $p < 0.001$ ); |                                                                                                                          |
|                                |                                                                                                                        |     |            |        |       |           |                                                                                                                                                      |                |                                  |                                                                                                                                                                                                                                             | All-doses completion for 11–12yo from 32.0% pre to 52.7% post in intervention group vs from 31.6% pre to 52.3% post (ns) |

|  |  |  |  |  |  |  |  |  |  |  |  |  |  |  |  |  |  |  |  |  |  |  |  |  |  |  |  |  |  |  |  |  |  |  |  |  |  |  |  |  |  |  |  |  |  |  |  |  |  |  |  |  |  |  |  |  |  |  |  |  |  |  |  |  |  |  |  |  |  |  |  |  |  |  |  |  |  |  |  |  |  |  |  |  |  |  |  |  |  |  |  |  |  |  |  |  |  |  |  |  |  |  |  |  |  |  |  |  |  |  |  |  |  |  |  |  |  |  |  |  |  |  |  |  |  |  |  |  |  |  |  |  |  |  |  |  |  |  |  |  |  |  |  |  |  |  |  |  |  |  |  |  |  |  |  |  |  |  |  |  |  |  |  |  |  |  |  |  |  |  |  |  |  |  |  |  |  |  |  |  |  |  |  |  |  |  |  |  |  |  |  |  |  |  |  |  |  |  |  |  |  |  |  |  |  |  |  |  |  |  |  |  |  |  |  |  |  |  |  |  |  |  |  |  |  |  |  |  |  |  |  |  |  |  |  |  |  |  |  |  |  |  |  |  |  |  |  |  |  |  |  |  |  |  |  |  |  |  |  |  |  |  |  |  |  |  |  |  |  |  |  |  |  |  |  |  |  |  |  |  |  |  |  |  |  |  |  |  |  |  |  |  |  |  |  |  |  |  |  |  |  |  |  |  |  |  |  |  |  |  |  |  |  |  |  |  |  |  |  |  |  |  |  |  |  |  |  |  |  |  |  |  |  |  |  |  |  |  |  |  |  |  |  |  |  |  |  |  |  |  |  |  |  |  |  |  |  |  |  |  |  |  |  |  |  |  |  |  |  |  |  |  |  |  |  |  |  |  |  |  |  |  |  |  |  |  |  |  |  |  |  |  |  |  |  |  |  |  |  |  |  |  |  |  |  |  |  |  |  |  |  |  |  |  |  |  |  |  |  |  |  |  |  |  |  |  |  |  |  |  |  |  |  |  |  |  |  |  |  |  |  |  |  |  |  |  |  |  |  |  |  |  |  |  |  |  |  |  |  |  |  |  |  |  |  |  |  |  |  |  |  |  |  |  |  |  |  |  |  |  |  |  |  |  |  |  |  |  |  |  |  |  |  |  |  |  |  |  |  |  |  |  |  |  |  |  |  |  |  |  |  |  |  |  |  |  |  |  |  |  |  |  |  |  |  |  |  |  |  |  |  |  |  |  |  |  |  |  |  |  |  |  |  |  |  |  |  |  |  |  |  |  |  |  |  |  |  |  |  |  |  |  |  |  |  |  |  |  |  |  |  |  |  |  |  |  |  |  |  |  |  |  |  |  |  |  |  |  |  |  |  |  |  |  |  |  |  |  |  |  |  |  |  |  |  |  |  |  |  |  |  |  |  |  |  |  |  |  |  |  |  |  |  |  |  |  |  |  |  |  |  |  |  |  |  |  |  |  |  |  |  |  |  |  |  |  |  |  |  |  |  |  |  |  |  |  |  |  |  |  |  |  |  |  |  |  |  |  |  |  |  |  |  |  |  |  |  |  |  |  |  |  |  |  |  |  |  |  |  |  |  |  |  |  |  |  |  |  |  |  |  |  |  |  |  |  |  |  |  |  |  |  |  |  |  |  |  |  |  |  |  |  |  |  |  |  |  |  |  |  |  |  |  |  |  |  |  |  |  |  |  |  |  |  |  |  |  |  |  |  |  |  |  |  |  |  |  |  |  |  |  |  |  |  |  |  |  |  |  |  |  |  |  |  |  |  |  |  |  |  |  |  |  |  |  |  |  |  |  |  |  |  |  |  |  |  |  |  |  |  |  |  |  |  |  |  |  |  |  |  |  |  |  |  |  |  |  |  |  |  |  |  |  |  |  |  |  |  |  |  |  |  |  |  |  |  |  |  |  |  |  |  |  |  |  |  |  |  |  |  |  |  |  |  |  |  |  |  |  |  |  |  |  |  |  |  |  |  |  |  |  |  |  |  |  |  |  |  |  |  |  |  |  |  |  |  |  |  |  |  |  |  |  |  |  |  |  |  |  |  |  |  |  |  |  |  |  |  |  |  |  |  |  |  |  |  |  |  |  |  |  |  |  |  |  |  |  |  |  |  |  |  |  |  |  |  |  |  |  |  |  |  |  |  |  |  |  |  |  |  |  |  |  |  |  |  |  |  |  |  |  |  |  |  |  |  |  |  |  |  |  |  |  |  |  |  |  |  |  |  |  |  |  |  |  |  |  |  |  |  |  |  |  |  |  |  |  |  |  |  |  |  |  |  |  |  |  |  |  |  |  |  |  |  |  |  |  |  |  |  |  |  |  |  |  |  |  |  |  |  |  |  |  |  |  |  |  |  |  |  |  |  |  |  |  |  |  |  |  |  |  |  |  |  |  |  |  |  |  |  |  |  |  |  |  |  |  |  |  |  |  |  |  |  |  |  |  |  |  |  |  |  |  |  |  |  |  |  |  |  |  |  |  |  |  |  |  |  |  |  |  |  |  |  |  |  |  |  |  |  |  |  |  |  |  |  |  |  |  |  |  |  |  |  |  |  |  |  |  |  |  |  |  |  |  |  |  |  |  |  |  |  |  |  |  |  |  |  |  |  |  |  |  |  |  |  |  |  |  |  |  |  |  |  |  |  |  |  |  |  |  |  |  |  |  |  |  |  |  |  |  |  |  |  |  |  |  |  |  |  |  |  |  |  |  |  |  |  |  |  |  |  |  |  |  |  |  |  |  |  |  |  |  |  |  |  |  |  |  |  |  |  |  |  |  |  |  |  |  |  |  |  |  |  |  |  |  |  |  |  |  |  |  |  |  |  |  |  |  |  |  |  |  |  |  |  |  |  |  |  |  |  |  |  |  |  |  |  |  |  |  |  |  |  |  |  |  |  |  |  |  |  |  |  |  |  |  |  |  |  |  |  |  |  |  |  |  |  |  |  |  |  |  |  |  |  |  |  |  |  |  |  |  |  |  |  |  |  |  |  |  |  |  |  |  |  |  |  |  |  |  |  |  |  |  |  |  |  |  |  |  |  |  |  |  |  |  |  |  |  |  |  |  |  |  |  |  |  |  |  |  |  |  |  |  |  |  |  |  |  |  |  |  |  |  |  |  |  |  |  |  |  |  |  |  |  |  |  |  |  |  |  |  |  |  |  |  |  |  |  |  |  |  |  |  |  |  |  |  |  |  |  |  |  |  |  |  |  |  |  |  |  |  |  |  |  |  |  |  |  |  |  |  |  |  |  |  |  |  |  |  |  |  |  |  |  |  |  |  |  |  |  |  |  |  |  |  |  |  |  |  |  |  |  |  |  |  |  |  |  |  |  |  |  |  |  |  |  |  |  |  |  |  |  |  |  |  |  |  |  |  |  |  |  |  |  |  |  |  |  |  |  |  |  |  |  |  |  |  |  |  |  |  |  |  |  |  |  |  |  |  |  |  |  |  |  |  |  |  |  |  |  |  |  |  |  |  |  |  |  |  |  |  |  |  |  |  |  |  |  |  |  |  |  |  |  |  |  |  |  |  |  |  |  |  |  |  |  |  |  |  |  |  |  |  |  |  |  |  |  |  |  |  |  |  |  |  |  |  |  |  |  |  |  |  |  |  |  |  |  |  |  |  |  |  |  |  |  |  |  |  |  |  |  |  |  |  |  |  |  |  |  |  |  |  |  |  |  |  |  |  |  |  |  |  |
|--|--|--|--|--|--|--|--|--|--|--|--|--|--|--|--|--|--|--|--|--|--|--|--|--|--|--|--|--|--|--|--|--|--|--|--|--|--|--|--|--|--|--|--|--|--|--|--|--|--|--|--|--|--|--|--|--|--|--|--|--|--|--|--|--|--|--|--|--|--|--|--|--|--|--|--|--|--|--|--|--|--|--|--|--|--|--|--|--|--|--|--|--|--|--|--|--|--|--|--|--|--|--|--|--|--|--|--|--|--|--|--|--|--|--|--|--|--|--|--|--|--|--|--|--|--|--|--|--|--|--|--|--|--|--|--|--|--|--|--|--|--|--|--|--|--|--|--|--|--|--|--|--|--|--|--|--|--|--|--|--|--|--|--|--|--|--|--|--|--|--|--|--|--|--|--|--|--|--|--|--|--|--|--|--|--|--|--|--|--|--|--|--|--|--|--|--|--|--|--|--|--|--|--|--|--|--|--|--|--|--|--|--|--|--|--|--|--|--|--|--|--|--|--|--|--|--|--|--|--|--|--|--|--|--|--|--|--|--|--|--|--|--|--|--|--|--|--|--|--|--|--|--|--|--|--|--|--|--|--|--|--|--|--|--|--|--|--|--|--|--|--|--|--|--|--|--|--|--|--|--|--|--|--|--|--|--|--|--|--|--|--|--|--|--|--|--|--|--|--|--|--|--|--|--|--|--|--|--|--|--|--|--|--|--|--|--|--|--|--|--|--|--|--|--|--|--|--|--|--|--|--|--|--|--|--|--|--|--|--|--|--|--|--|--|--|--|--|--|--|--|--|--|--|--|--|--|--|--|--|--|--|--|--|--|--|--|--|--|--|--|--|--|--|--|--|--|--|--|--|--|--|--|--|--|--|--|--|--|--|--|--|--|--|--|--|--|--|--|--|--|--|--|--|--|--|--|--|--|--|--|--|--|--|--|--|--|--|--|--|--|--|--|--|--|--|--|--|--|--|--|--|--|--|--|--|--|--|--|--|--|--|--|--|--|--|--|--|--|--|--|--|--|--|--|--|--|--|--|--|--|--|--|--|--|--|--|--|--|--|--|--|--|--|--|--|--|--|--|--|--|--|--|--|--|--|--|--|--|--|--|--|--|--|--|--|--|--|--|--|--|--|--|--|--|--|--|--|--|--|--|--|--|--|--|--|--|--|--|--|--|--|--|--|--|--|--|--|--|--|--|--|--|--|--|--|--|--|--|--|--|--|--|--|--|--|--|--|--|--|--|--|--|--|--|--|--|--|--|--|--|--|--|--|--|--|--|--|--|--|--|--|--|--|--|--|--|--|--|--|--|--|--|--|--|--|--|--|--|--|--|--|--|--|--|--|--|--|--|--|--|--|--|--|--|--|--|--|--|--|--|--|--|--|--|--|--|--|--|--|--|--|--|--|--|--|--|--|--|--|--|--|--|--|--|--|--|--|--|--|--|--|--|--|--|--|--|--|--|--|--|--|--|--|--|--|--|--|--|--|--|--|--|--|--|--|--|--|--|--|--|--|--|--|--|--|--|--|--|--|--|--|--|--|--|--|--|--|--|--|--|--|--|--|--|--|--|--|--|--|--|--|--|--|--|--|--|--|--|--|--|--|--|--|--|--|--|--|--|--|--|--|--|--|--|--|--|--|--|--|--|--|--|--|--|--|--|--|--|--|--|--|--|--|--|--|--|--|--|--|--|--|--|--|--|--|--|--|--|--|--|--|--|--|--|--|--|--|--|--|--|--|--|--|--|--|--|--|--|--|--|--|--|--|--|--|--|--|--|--|--|--|--|--|--|--|--|--|--|--|--|--|--|--|--|--|--|--|--|--|--|--|--|--|--|--|--|--|--|--|--|--|--|--|--|--|--|--|--|--|--|--|--|--|--|--|--|--|--|--|--|--|--|--|--|--|--|--|--|--|--|--|--|--|--|--|--|--|--|--|--|--|--|--|--|--|--|--|--|--|--|--|--|--|--|--|--|--|--|--|--|--|--|--|--|--|--|--|--|--|--|--|--|--|--|--|--|--|--|--|--|--|--|--|--|--|--|--|--|--|--|--|--|--|--|--|--|--|--|--|--|--|--|--|--|--|--|--|--|--|--|--|--|--|--|--|--|--|--|--|--|--|--|--|--|--|--|--|--|--|--|--|--|--|--|--|--|--|--|--|--|--|--|--|--|--|--|--|--|--|--|--|--|--|--|--|--|--|--|--|--|--|--|--|--|--|--|--|--|--|--|--|--|--|--|--|--|--|--|--|--|--|--|--|--|--|--|--|--|--|--|--|--|--|--|--|--|--|--|--|--|--|--|--|--|--|--|--|--|--|--|--|--|--|--|--|--|--|--|--|--|--|--|--|--|--|--|--|--|--|--|--|--|--|--|--|--|--|--|--|--|--|--|--|--|--|--|--|--|--|--|--|--|--|--|--|--|--|--|--|--|--|--|--|--|--|--|--|--|--|--|--|--|--|--|--|--|--|--|--|--|--|--|--|--|--|--|--|--|--|--|--|--|--|--|--|--|--|--|--|--|--|--|--|--|--|--|--|--|--|--|--|--|--|--|--|--|--|--|--|--|--|--|--|--|--|--|--|--|--|--|--|--|--|--|--|--|--|--|--|--|--|--|--|--|--|--|--|--|--|--|--|--|--|--|--|--|--|--|--|--|--|--|--|--|--|--|--|--|--|--|--|--|--|--|--|--|--|--|--|--|--|--|--|--|--|--|--|--|--|--|--|--|--|--|--|--|--|--|--|--|--|--|--|--|--|--|--|--|--|--|--|--|--|--|--|--|--|--|--|--|--|--|--|--|--|--|--|--|--|--|--|--|--|--|--|--|--|--|--|--|--|--|--|--|--|--|--|--|--|--|--|--|--|--|--|--|--|--|--|--|--|--|--|--|--|--|--|--|--|--|--|--|--|--|--|--|--|--|--|--|--|--|--|--|--|--|--|--|--|--|--|--|--|--|--|--|--|--|--|--|--|--|--|--|--|--|--|--|--|--|--|--|--|--|--|--|--|--|--|--|--|--|--|--|--|--|--|--|--|--|--|--|--|--|--|--|--|--|--|--|--|--|--|--|--|--|--|--|--|--|--|--|--|--|--|--|--|--|--|--|--|--|--|--|--|--|--|--|--|--|--|--|--|--|--|--|--|--|--|--|--|--|--|--|--|--|--|--|--|--|--|--|--|--|--|--|--|--|--|--|--|--|--|--|--|--|--|--|--|--|--|--|--|--|--|--|--|--|--|--|--|--|--|--|--|--|--|--|--|--|--|--|--|--|--|--|--|--|--|--|--|--|--|--|--|--|--|--|--|--|--|--|--|--|--|--|--|--|--|--|--|--|--|--|--|--|--|--|--|--|--|--|--|--|--|--|--|--|--|--|--|--|--|--|--|--|--|--|--|--|--|--|--|--|--|--|--|--|--|--|--|--|--|--|--|--|--|--|--|--|--|--|--|--|--|--|--|--|--|--|--|--|--|--|--|--|--|--|--|--|--|--|--|--|--|--|--|--|--|--|--|--|--|--|--|--|--|--|--|--|--|--|--|--|--|--|--|--|--|--|--|--|--|--|--|--|--|--|--|--|--|--|--|--|--|--|--|--|--|--|--|--|--|--|--|--|--|--|--|--|--|--|--|--|--|--|--|--|--|--|--|--|--|--|--|--|--|--|--|--|--|--|--|--|--|
|  |  |  |  |  |  |  |  |  |  |  |  |  |  |  |  |  |  |  |  |  |  |  |  |  |  |  |  |  |  |  |  |  |  |  |  |  |  |  |  |  |  |  |  |  |  |  |  |  |  |  |  |  |  |  |  |  |  |  |  |  |  |  |  |  |  |  |  |  |  |  |  |  |  |  |  |  |  |  |  |  |  |  |  |  |  |  |  |  |  |  |  |  |  |  |  |  |  |  |  |  |  |  |  |  |  |  |  |  |  |  |  |  |  |  |  |  |  |  |  |  |  |  |  |  |  |  |  |  |  |  |  |  |  |  |  |  |  |  |  |  |  |  |  |  |  |  |  |  |  |  |  |  |  |  |  |  |  |  |  |  |  |  |  |  |  |  |  |  |  |  |  |  |  |  |  |  |  |  |  |  |  |  |  |  |  |  |  |  |  |  |  |  |  |  |  |  |  |  |  |  |  |  |  |  |  |  |  |  |  |  |  |  |  |  |  |  |  |  |  |  |  |  |  |  |  |  |  |  |  |  |  |  |  |  |  |  |  |  |  |  |  |  |  |  |  |  |  |  |  |  |  |  |  |  |  |  |  |  |  |  |  |  |  |  |  |  |  |  |  |  |  |  |  |  |  |  |  |  |  |  |  |  |  |  |  |  |  |  |  |  |  |  |  |  |  |  |  |  |  |  |  |  |  |  |  |  |  |  |  |  |  |  |  |  |  |  |  |  |  |  |  |  |  |  |  |  |  |  |  |  |  |  |  |  |  |  |  |  |  |  |  |  |  |  |  |  |  |  |  |  |  |  |  |  |  |  |  |  |  |  |  |  |  |  |  |  |  |  |  |  |  |  |  |  |  |  |  |  |  |  |  |  |  |  |  |  |  |  |  |  |  |  |  |  |  |  |  |  |  |  |  |  |  |  |  |  |  |  |  |  |  |  |  |  |  |  |  |  |  |  |  |  |  |  |  |  |  |  |  |  |  |  |  |  |  |  |  |  |  |  |  |  |  |  |  |  |  |  |  |  |  |  |  |  |  |  |  |  |  |  |  |  |  |  |  |  |  |  |  |  |  |  |  |  |  |  |  |  |  |  |  |  |  |  |  |  |  |  |  |  |  |  |  |  |  |  |  |  |  |  |  |  |  |  |  |  |  |  |  |  |  |  |  |  |  |  |  |  |  |  |  |  |  |  |  |  |  |  |  |  |  |  |  |  |  |  |  |  |  |  |  |  |  |  |  |  |  |  |  |  |  |  |  |  |  |  |  |  |  |  |  |  |  |  |  |  |  |  |  |  |  |  |  |  |  |  |  |  |  |  |  |  |  |  |  |  |  |  |  |  |  |  |  |  |  |  |  |  |  |  |  |  |  |  |  |  |  |  |  |  |  |  |  |  |  |  |  |  |  |  |  |  |  |  |  |  |  |  |  |  |  |  |  |  |  |  |  |  |  |  |  |  |  |  |  |  |  |  |  |  |  |  |  |  |  |  |  |  |  |  |  |  |  |  |  |  |  |  |  |  |  |  |  |  |  |  |  |  |  |  |  |  |  |  |  |  |  |  |  |  |  |  |  |  |  |  |  |  |  |  |  |  |  |  |  |  |  |  |  |  |  |  |  |  |  |  |  |  |  |  |  |  |  |  |  |  |  |  |  |  |  |  |  |  |  |  |  |  |  |  |  |  |  |  |  |  |  |  |  |  |  |  |  |  |  |  |  |  |  |  |  |  |  |  |  |  |  |  |  |  |  |  |  |  |  |  |  |  |  |  |  |  |  |  |  |  |  |  |  |  |  |  |  |  |  |  |  |  |  |  |  |  |  |  |  |  |  |  |  |  |  |  |  |  |  |  |  |  |  |  |  |  |  |  |  |  |  |  |  |  |  |  |  |  |  |  |  |  |  |  |  |  |  |  |  |  |  |  |  |  |  |  |  |  |  |  |  |  |  |  |  |  |  |  |  |  |  |  |  |  |  |  |  |  |  |  |  |  |  |  |  |  |  |  |  |  |  |  |  |  |  |  |  |  |  |  |  |  |  |  |  |  |  |  |  |  |  |  |  |  |  |  |  |  |  |  |  |  |  |  |  |  |  |  |  |  |  |  |  |  |  |  |  |  |  |  |  |  |  |  |  |  |  |  |  |  |  |  |  |  |  |  |  |  |  |  |  |  |  |  |  |  |  |  |  |  |  |  |  |  |  |  |  |  |  |  |  |  |  |  |  |  |  |  |  |  |  |  |  |  |  |  |  |  |  |  |  |  |  |  |  |  |  |  |  |  |  |  |  |  |  |  |  |  |  |  |  |  |  |  |  |  |  |  |  |  |  |  |  |  |  |  |  |  |  |  |  |  |  |  |  |  |  |  |  |  |  |  |  |  |  |  |  |  |  |  |  |  |  |  |  |  |  |  |  |  |  |  |  |  |  |  |  |  |  |  |  |  |  |  |  |  |  |  |  |  |  |  |  |  |  |  |  |  |  |  |  |  |  |  |  |  |  |  |  |  |  |  |  |  |  |  |  |  |  |  |  |  |  |  |  |  |  |  |  |  |  |  |  |  |  |  |  |  |  |  |  |  |  |  |  |  |  |  |  |  |  |  |  |  |  |  |  |  |  |  |  |  |  |  |  |  |  |  |  |  |  |  |  |  |  |  |  |  |  |  |  |  |  |  |  |  |  |  |  |  |  |  |  |  |  |  |  |  |  |  |  |  |  |  |  |  |  |  |  |  |  |  |  |  |  |  |  |  |  |  |  |  |  |  |  |  |  |  |  |  |  |  |  |  |  |  |  |  |  |  |  |  |  |  |  |  |  |  |  |  |  |  |  |  |  |  |  |  |  |  |  |  |  |  |  |  |  |  |  |  |  |  |  |  |  |  |  |  |  |  |  |  |  |  |  |  |  |  |  |  |  |  |  |  |  |  |  |  |  |  |  |  |  |  |  |  |  |  |  |  |  |  |  |  |  |  |  |  |  |  |  |  |  |  |  |  |  |  |  |  |  |  |  |  |  |  |  |  |  |  |  |  |  |  |  |  |  |  |  |  |  |  |  |  |  |  |  |  |  |  |  |  |  |  |  |  |  |  |  |  |  |  |  |  |  |  |  |  |  |  |  |  |  |  |  |  |  |  |  |  |  |  |  |  |  |  |  |  |  |  |  |  |  |  |  |  |  |  |  |  |  |  |  |  |  |  |  |  |  |  |  |  |  |  |  |  |  |  |  |  |  |  |  |  |  |  |  |  |  |  |  |  |  |  |  |  |  |  |  |  |  |  |  |  |  |  |  |  |  |  |  |  |  |  |  |  |  |  |  |  |  |  |  |  |  |  |  |  |  |  |  |  |  |  |  |  |  |  |  |  |  |  |  |  |  |  |  |  |  |  |  |  |  |  |  |  |  |  |  |  |  |  |  |  |  |  |  |  |  |  |  |  |  |  |  |  |  |  |  |  |  |  |  |  |  |  |  |  |  |  |  |  |  |  |  |  |  |  |  |  |  |  |  |  |  |  |  |  |  |  |  |  |  |  |  |  |  |  |  |  |  |  |  |  |  |  |  |  |  |  |  |  |  |  |  |  |  |  |  |  |  |  |  |  |  |  |  |  |  |  |  |  |  |  |  |  |  |  |  |  |  |  |  |  |  |  |  |  |  |  |  |  |  |  |  |  |  |  |  |  |  |  |  |  |  |  |  |  |  |
|--|--|--|--|--|--|--|--|--|--|--|--|--|--|--|--|--|--|--|--|--|--|--|--|--|--|--|--|--|--|--|--|--|--|--|--|--|--|--|--|--|--|--|--|--|--|--|--|--|--|--|--|--|--|--|--|--|--|--|--|--|--|--|--|--|--|--|--|--|--|--|--|--|--|--|--|--|--|--|--|--|--|--|--|--|--|--|--|--|--|--|--|--|--|--|--|--|--|--|--|--|--|--|--|--|--|--|--|--|--|--|--|--|--|--|--|--|--|--|--|--|--|--|--|--|--|--|--|--|--|--|--|--|--|--|--|--|--|--|--|--|--|--|--|--|--|--|--|--|--|--|--|--|--|--|--|--|--|--|--|--|--|--|--|--|--|--|--|--|--|--|--|--|--|--|--|--|--|--|--|--|--|--|--|--|--|--|--|--|--|--|--|--|--|--|--|--|--|--|--|--|--|--|--|--|--|--|--|--|--|--|--|--|--|--|--|--|--|--|--|--|--|--|--|--|--|--|--|--|--|--|--|--|--|--|--|--|--|--|--|--|--|--|--|--|--|--|--|--|--|--|--|--|--|--|--|--|--|--|--|--|--|--|--|--|--|--|--|--|--|--|--|--|--|--|--|--|--|--|--|--|--|--|--|--|--|--|--|--|--|--|--|--|--|--|--|--|--|--|--|--|--|--|--|--|--|--|--|--|--|--|--|--|--|--|--|--|--|--|--|--|--|--|--|--|--|--|--|--|--|--|--|--|--|--|--|--|--|--|--|--|--|--|--|--|--|--|--|--|--|--|--|--|--|--|--|--|--|--|--|--|--|--|--|--|--|--|--|--|--|--|--|--|--|--|--|--|--|--|--|--|--|--|--|--|--|--|--|--|--|--|--|--|--|--|--|--|--|--|--|--|--|--|--|--|--|--|--|--|--|--|--|--|--|--|--|--|--|--|--|--|--|--|--|--|--|--|--|--|--|--|--|--|--|--|--|--|--|--|--|--|--|--|--|--|--|--|--|--|--|--|--|--|--|--|--|--|--|--|--|--|--|--|--|--|--|--|--|--|--|--|--|--|--|--|--|--|--|--|--|--|--|--|--|--|--|--|--|--|--|--|--|--|--|--|--|--|--|--|--|--|--|--|--|--|--|--|--|--|--|--|--|--|--|--|--|--|--|--|--|--|--|--|--|--|--|--|--|--|--|--|--|--|--|--|--|--|--|--|--|--|--|--|--|--|--|--|--|--|--|--|--|--|--|--|--|--|--|--|--|--|--|--|--|--|--|--|--|--|--|--|--|--|--|--|--|--|--|--|--|--|--|--|--|--|--|--|--|--|--|--|--|--|--|--|--|--|--|--|--|--|--|--|--|--|--|--|--|--|--|--|--|--|--|--|--|--|--|--|--|--|--|--|--|--|--|--|--|--|--|--|--|--|--|--|--|--|--|--|--|--|--|--|--|--|--|--|--|--|--|--|--|--|--|--|--|--|--|--|--|--|--|--|--|--|--|--|--|--|--|--|--|--|--|--|--|--|--|--|--|--|--|--|--|--|--|--|--|--|--|--|--|--|--|--|--|--|--|--|--|--|--|--|--|--|--|--|--|--|--|--|--|--|--|--|--|--|--|--|--|--|--|--|--|--|--|--|--|--|--|--|--|--|--|--|--|--|--|--|--|--|--|--|--|--|--|--|--|--|--|--|--|--|--|--|--|--|--|--|--|--|--|--|--|--|--|--|--|--|--|--|--|--|--|--|--|--|--|--|--|--|--|--|--|--|--|--|--|--|--|--|--|--|--|--|--|--|--|--|--|--|--|--|--|--|--|--|--|--|--|--|--|--|--|--|--|--|--|--|--|--|--|--|--|--|--|--|--|--|--|--|--|--|--|--|--|--|--|--|--|--|--|--|--|--|--|--|--|--|--|--|--|--|--|--|--|--|--|--|--|--|--|--|--|--|--|--|--|--|--|--|--|--|--|--|--|--|--|--|--|--|--|--|--|--|--|--|--|--|--|--|--|--|--|--|--|--|--|--|--|--|--|--|--|--|--|--|--|--|--|--|--|--|--|--|--|--|--|--|--|--|--|--|--|--|--|--|--|--|--|--|--|--|--|--|--|--|--|--|--|--|--|--|--|--|--|--|--|--|--|--|--|--|--|--|--|--|--|--|--|--|--|--|--|--|--|--|--|--|--|--|--|--|--|--|--|--|--|--|--|--|--|--|--|--|--|--|--|--|--|--|--|--|--|--|--|--|--|--|--|--|--|--|--|--|--|--|--|--|--|--|--|--|--|--|--|--|--|--|--|--|--|--|--|--|--|--|--|--|--|--|--|--|--|--|--|--|--|--|--|--|--|--|--|--|--|--|--|--|--|--|--|--|--|--|--|--|--|--|--|--|--|--|--|--|--|--|--|--|--|--|--|--|--|--|--|--|--|--|--|--|--|--|--|--|--|--|--|--|--|--|--|--|--|--|--|--|--|--|--|--|--|--|--|--|--|--|--|--|--|--|--|--|--|--|--|--|--|--|--|--|--|--|--|--|--|--|--|--|--|--|--|--|--|--|--|--|--|--|--|--|--|--|--|--|--|--|--|--|--|--|--|--|--|--|--|--|--|--|--|--|--|--|--|--|--|--|--|--|--|--|--|--|--|--|--|--|--|--|--|--|--|--|--|--|--|--|--|--|--|--|--|--|--|--|--|--|--|--|--|--|--|--|--|--|--|--|--|--|--|--|--|--|--|--|--|--|--|--|--|--|--|--|--|--|--|--|--|--|--|--|--|--|--|--|--|--|--|--|--|--|--|--|--|--|--|--|--|--|--|--|--|--|--|--|--|--|--|--|--|--|--|--|--|--|--|--|--|--|--|--|--|--|--|--|--|--|--|--|--|--|--|--|--|--|--|--|--|--|--|--|--|--|--|--|--|--|--|--|--|--|--|--|--|--|--|--|--|--|--|--|--|--|--|--|--|--|--|--|--|--|--|--|--|--|--|--|--|--|--|--|--|--|--|--|--|--|--|--|--|--|--|--|--|--|--|--|--|--|--|--|--|--|--|--|--|--|--|--|--|--|--|--|--|--|--|--|--|--|--|--|--|--|--|--|--|--|--|--|--|--|--|--|--|--|--|--|--|--|--|--|--|--|--|--|--|--|--|--|--|--|--|--|--|--|--|--|--|--|--|--|--|--|--|--|--|--|--|--|--|--|--|--|--|--|--|--|--|--|--|--|--|--|--|--|--|--|--|--|--|--|--|--|--|--|--|--|--|--|--|--|--|--|--|--|--|--|--|--|--|--|--|--|--|--|--|--|--|--|--|--|--|--|--|--|--|--|--|--|--|--|--|--|--|--|--|--|--|--|--|--|--|--|--|--|--|--|--|--|--|--|--|--|--|--|--|--|--|--|--|--|--|--|--|--|--|--|--|--|--|--|--|--|--|--|--|--|--|--|--|--|--|--|--|--|--|--|--|--|--|--|--|--|--|--|--|--|--|--|--|--|--|--|--|--|--|--|--|--|--|--|--|--|--|--|--|--|--|--|--|--|--|--|--|--|--|--|--|--|--|--|--|--|--|--|--|--|--|--|--|--|--|--|--|--|--|--|--|--|--|--|--|--|--|--|--|--|--|--|--|--|--|--|--|--|--|--|--|--|--|--|--|--|--|--|--|--|--|--|--|--|--|--|--|--|--|

|                                                                                                                                                                                                                                                                                                                                                                                                                                                                                                                                                                                                                                                                                                             |                                                                      |
|-------------------------------------------------------------------------------------------------------------------------------------------------------------------------------------------------------------------------------------------------------------------------------------------------------------------------------------------------------------------------------------------------------------------------------------------------------------------------------------------------------------------------------------------------------------------------------------------------------------------------------------------------------------------------------------------------------------|----------------------------------------------------------------------|
| session for providers<br>(current EB HPVv<br>information and<br>strategies for discussing<br>vaccination with parents.<br>Parents-level<br>intervention:<br>An initial phone call, a<br>mail packet including a<br>\$10 thank you gift card<br>for completing the<br>telephone-administered<br>baseline survey, an<br>educational brochure and<br>DVD video about HPV<br>and HPVv, a magnet<br>reminder to get the 2nd<br>and 3rd HPV vaccine<br>shots, and a CDC HPVv<br>information statement, a<br>medical record release<br>form and a self-<br>administered survey to<br>return. At the and a \$5<br>gift upon receipt of these<br>items.<br>A second telephone<br>education session about<br>the HPVv | 13.1% intervention<br>group vs 6.5% control<br>group ( $p = 0.002$ ) |
|-------------------------------------------------------------------------------------------------------------------------------------------------------------------------------------------------------------------------------------------------------------------------------------------------------------------------------------------------------------------------------------------------------------------------------------------------------------------------------------------------------------------------------------------------------------------------------------------------------------------------------------------------------------------------------------------------------------|----------------------------------------------------------------------|

|                                 |                                                                                                                    |     |            |      |       |      |                                                                                                                                                                            |                    |                                               |                                                                                                                  |
|---------------------------------|--------------------------------------------------------------------------------------------------------------------|-----|------------|------|-------|------|----------------------------------------------------------------------------------------------------------------------------------------------------------------------------|--------------------|-----------------------------------------------|------------------------------------------------------------------------------------------------------------------|
| Perkins,<br>R. B.,<br>2015 (20) | Effectiveness of a<br>provider-focused<br>intervention to<br>improve HPV<br>vaccination rates in<br>boys and girls | RCT | Registries | 7546 | 11–21 | HCPs | Four essential<br>components: 1. repeated<br>contacts with providers,<br>2. focused education, 3.<br>individualized feedback<br>on vaccination rates, 4.<br>strong quality | Multicompo<br>nent | First<br>dose;<br>all-doses<br>completi<br>on | Y<br>Gender-specific<br>First dose uptake OR<br>1.6 ( $p < 0.001$ ) for F<br>and OR 11 ( $p < 0.001$ )<br>for M; |
|---------------------------------|--------------------------------------------------------------------------------------------------------------------|-----|------------|------|-------|------|----------------------------------------------------------------------------------------------------------------------------------------------------------------------------|--------------------|-----------------------------------------------|------------------------------------------------------------------------------------------------------------------|

|                             |                                                                                                                                                                                                                  |     |            |      |       |     |                                                                                                                                                                                                                                                                      |                           |                             |                                                                                                                                                                                              |
|-----------------------------|------------------------------------------------------------------------------------------------------------------------------------------------------------------------------------------------------------------|-----|------------|------|-------|-----|----------------------------------------------------------------------------------------------------------------------------------------------------------------------------------------------------------------------------------------------------------------------|---------------------------|-----------------------------|----------------------------------------------------------------------------------------------------------------------------------------------------------------------------------------------|
|                             |                                                                                                                                                                                                                  |     |            |      |       |     | improvement incentives<br>in the form of<br>maintenance of board<br>certification requirements                                                                                                                                                                       |                           |                             | All doses completion<br>OR 1.4 ( $p < 0.05$ ) for F<br>and OR 23 ( $p < 0.05$ )<br>for M                                                                                                     |
| Pot M,<br>2017 (21)         | Effectiveness of a<br>web-based tailored<br>intervention with<br>virtual assistants<br>promoting the<br>acceptability of HPV<br>vaccination among<br>mothers of invited<br>girls: randomized<br>controlled trial | RCT | Registries | 8062 | 12    | A/P | Developing a website<br>providing mothers with<br>tailored feedback (a<br>health communication<br>strategy in which<br>messages are<br>individualized to the<br>person's preferences and<br>needs) from 2 virtual<br>assistants (mother or<br>doctor like assistant) | Education/In<br>formation | First dose                  | N                                                                                                                                                                                            |
| Rand C.<br>M., 2015<br>(22) | Effectiveness of<br>centralized text<br>message reminders<br>on human<br>papillomavirus<br>immunization<br>coverage for publicly<br>insured adolescents                                                          | RCT | Registries | 3812 | 11–16 | A/P | Text message reminders                                                                                                                                                                                                                                               | Remind                    | First dose                  | Y<br>HR = 1.3 (95% CI 1.0–<br>1.6)                                                                                                                                                           |
| Rand<br>C.M.,<br>2017 (23)  | effects of phone and<br>text message<br>reminders on<br>completion of the<br>Human<br>Papillomavirus<br>vaccine series                                                                                           | RCT | Registries | 749  | 11–17 | A/P | Telephonic or text<br>message reminders                                                                                                                                                                                                                              | Remind                    | All-doses<br>completi<br>on | Y<br>Second dose HR<br>ranged from 1.45<br>(95% CI 1.04–2.01) to<br>1.64 (95% CI 1.21–<br>2.23)<br>Third dose HR<br>ranged from 1.72<br>(95% CI 1.04–2.85) to<br>2.34 (95% CI 1.67–<br>2.27) |

|                         |                                                                                                                                                        |          |            |         |       |      |                                                                                                                                                                                                                                                                                   |                       |                                  |                                                                                                                                                                  |
|-------------------------|--------------------------------------------------------------------------------------------------------------------------------------------------------|----------|------------|---------|-------|------|-----------------------------------------------------------------------------------------------------------------------------------------------------------------------------------------------------------------------------------------------------------------------------------|-----------------------|----------------------------------|------------------------------------------------------------------------------------------------------------------------------------------------------------------|
| Rand C.M., 2018 (24)    | A learning collaborative model to improve Human Papillomavirus vaccination rates in primary care                                                       | Q-E      | Registries | 50      | 11–17 | HCPs | A webinar for providers addressing how to give strong recommendation about HPVv, a report on MO and electronic remind or standing orders                                                                                                                                          | Multicomponent        | First dose                       | Y<br>Gender specific<br>From 66% pre to 74% post for F ( $p < 0.01$ ), from 57% pre to 65% post for M ( $p < 0.01$ ) and from 62% to 70% for both ( $p < 0.01$ ) |
| Rehn M., 2016 (25)      | Highest vaccine uptake after school-based delivery – A county-level evaluation of the implementation strategies for HPV catch-up vaccination in Sweden | Ecologic | Registries | 325,229 | 10–12 | A/P  | Different combinations on strategies compared in different counties including an information channel (App for smartphone, media coverage, county website, school-based information, social media, alert, invitation letter, cinema, YouTube channel) and school-based vaccination | Multicomponent        | Any dose                         | Y<br>Vaccination in school IRR=1.3 (95% CI 1.1–1.5); school-based information IRR = 1.3 (95% CI 1.1–1.3)                                                         |
| Rickert V.I., 2015 (26) | School-based HPV immunization of young adolescents: effects of two brief health interventions                                                          | RCT      | Registries | 445     | ≤ 14  | A/P  | Short messages with rhetorical questions with a technic called “foot-in-the-door”                                                                                                                                                                                                 | Education/Information | First dose; all-doses completion | Y<br>First dose RR= 1.15 (95%CI 0.89–1.50);<br>No results reported for all-doses completion                                                                      |
| Ruffin M. T., 2015 (27) | Impact of an electronic health record (EHR) reminder on Human Papillomavirus (HPV) vaccine initiation and timely completion                            | CS       | Registries | 15,021  | 9–18  | HCPs | Systematic electronic reminder for the provider on vaccination at any medical visit                                                                                                                                                                                               | Remind                | First dose; all-doses completion | Y<br>Significant OR according to ethnicity ranging from 2.0 to 3.5 for first dose and from 10.1 to 10.4 for all-doses completion                                 |

|                                 |                                                                                                                                                               |     |            |      |         |              |                                                                                                                                           |                           |                                                |                                                                                                                                                                                                                                                                                             |
|---------------------------------|---------------------------------------------------------------------------------------------------------------------------------------------------------------|-----|------------|------|---------|--------------|-------------------------------------------------------------------------------------------------------------------------------------------|---------------------------|------------------------------------------------|---------------------------------------------------------------------------------------------------------------------------------------------------------------------------------------------------------------------------------------------------------------------------------------------|
| Sanderso<br>n M.,<br>2017 (28)  | Pragmatic trial of an<br>intervention to<br>increase human<br>papillomavirus<br>vaccination in safety-<br>net clinics                                         | NRT | Registries | 405  | 9–18    | A/P;<br>HCPs | Personalized educational<br>video with possibility to<br>make questions for<br>adolescents.<br>One-hour training<br>session for providers | Education/In<br>formation | First<br>dose;<br>all-doses<br>completi<br>on; | Y<br>AdjOR was<br>1.18 (95% CI 0.87–<br>1.60) for the first dose<br>and 0.50 (95% CI<br>0.29–0.88) for all<br>doses completion                                                                                                                                                              |
| Staras<br>S.A.S.,<br>2015 (29)  | Increasing Human<br>Papillomavirus<br>vaccine initiation<br>among publicly<br>insured Florida<br>adolescents                                                  | Q-E | Registries | 6123 | 11–17   | A/P          | Gender-specific postcard<br>campaign and/or in-clinic<br>HIT system                                                                       | Education/In<br>formation | First dose                                     | Y<br>Gender-specific<br>Postcard AdjOR 1.6<br>(95% CI 1.1–2.4) for F<br>and 1.1 (95% CI 0.8–<br>1.5) for M;<br>HIT AdjOR 1.3 (95%<br>CI 0.9–2.0) for F and<br>1.4 (95% CI 1.0–2.0)<br>for M;<br>Both interventions<br>AdjOR 2.0 (95% CI<br>1.1–3.7) for F and 1.6<br>(95% CI 1.0–2.5) for M |
| Szilagyi<br>P. G.,<br>2011 (30) | Effectiveness of a<br>citywide patient<br>immunization<br>navigator program on<br>improving adolescent<br>immunizations and<br>preventive care visit<br>rates | RCT | Registries | 4115 | 11–15   | A/P          | Three steps reminder<br>interventions:<br>Step 1: Patient Tracking<br>Step 2: Reminders/Recall<br>Step 3: Home Visits                     | Remind                    | First<br>dose;<br>All-doses<br>completi<br>on  | Y<br>First dose uptake<br>AdjRR 1.4 (95% CI<br>1.2–1.5);<br>All doses completion<br>AdjRR1.5 (95% CI<br>1.4–1.7)                                                                                                                                                                            |
| Szilagyi<br>P.G., 2013<br>(31)  | A randomized trial of<br>the effect of<br>centralized<br>reminder/recall on<br>immunizations and<br>preventive care visits<br>for adolescents                 | RCT | Registries | 7546 | 10.5–17 | A/P          | Mail or telephonic<br>reminder                                                                                                            | Remind                    | First dose                                     | Y<br>HR ranging from 1.1<br>to 1.6 ( $p < 0.05$ )                                                                                                                                                                                                                                           |

|                                   |                                                                                                                           |     |            |      |       |             |                                                                                                                                                                                                                                                                                                                                                                                                                |                    |                                               |                                                                                                                                               |
|-----------------------------------|---------------------------------------------------------------------------------------------------------------------------|-----|------------|------|-------|-------------|----------------------------------------------------------------------------------------------------------------------------------------------------------------------------------------------------------------------------------------------------------------------------------------------------------------------------------------------------------------------------------------------------------------|--------------------|-----------------------------------------------|-----------------------------------------------------------------------------------------------------------------------------------------------|
| Tiro J.A.,<br>2015 (32)           | Promoting HPV<br>vaccination in safety-<br>net clinics: A<br>randomized trial                                             | RCT | Registries | 814  | 11–18 | A/P         | 1. Information materials<br>specific on HPV via mail<br>1 - 2 weeks before the<br>first visit.<br>2. Recall 2 weeks after for<br>non-attenders<br>3. Recall for the other<br>doses for attenders                                                                                                                                                                                                               | Multicompo<br>nent | First<br>dose;<br>all-doses<br>completi<br>on | Y<br>No effect on first dose<br>uptake;<br>All doses completion<br>rate AdjOR 1.99 (95%<br>CI 1.16–3.45)                                      |
| Vanderp<br>ool R.C.,<br>2015 (33) | Implementation and<br>evaluation of a<br>school-based Human<br>Papillomavirus<br>vaccination program<br>in rural Kentucky | Q-E | Registries | 935  | 9–12  | A/P         | School-based<br>intervention including<br>Educational materials<br>and informed consent for<br>parents;<br>Telephonic contact with<br>parents to inform about<br>the program and to<br>remind the appointment<br>for vaccination.<br>Information materials for<br>students (articles,<br>website, t-shirt, school<br>events as pizza party etc.)<br>Active student<br>involvement in materials<br>development. | Multicompo<br>nent | First<br>dose;<br>all-doses<br>completi<br>on | Y<br>First dose uptake<br>increased from 3%<br>pre to 70% post;<br>All doses completion<br>increased from 10%<br>pre to 62% post              |
| Varman<br>M., 2018<br>(34)        | Human Papilloma<br>Virus vaccination<br>among adolescents in<br>a community clinic<br>before and after<br>intervention    | Q-E | Registries | 3393 | 9–18  | A/P;<br>HCP | Team discussions and<br>staff training for the<br>providers.<br>Reminder mail for<br>parents.<br>Information materials for<br>parents/adolescents.<br>Pictures and information<br>provided for utilization<br>in patient rooms                                                                                                                                                                                 | Multicompo<br>nent | All-doses<br>completi<br>on                   | Y<br>Gender-specific<br>All doses completion<br>increased from 50.6%<br>pre<br>to 54.0% post in F and<br>from 39.1% pre to<br>42.9% post in M |

|                          |                                                                                                                                                           |     |            |      |       |     |                                                                                                                                                             |                       |                                   |                                                                                                                                                                                                                                                                                                          |
|--------------------------|-----------------------------------------------------------------------------------------------------------------------------------------------------------|-----|------------|------|-------|-----|-------------------------------------------------------------------------------------------------------------------------------------------------------------|-----------------------|-----------------------------------|----------------------------------------------------------------------------------------------------------------------------------------------------------------------------------------------------------------------------------------------------------------------------------------------------------|
| Venturelli F., 2017 (35) | Association between mothers' screening uptake and daughters' HPV vaccination: a quasi-experimental study on the effect of an active invitation campaign   | Q-E | Registries | 4567 | 11–12 | A/P | Invitation for vaccination with information materials. Two consecutive reminders for non-attenders.                                                         | Multicomponent        | First dose; all-doses completion; | Y<br>First dose uptake increased from 46.3% pre (95% CI 44.2–48.4) to 77.9% post (95% CI 76.2–79.6). All doses completion increased from 43.9% pre a 74.9% post (No significance reported)                                                                                                               |
| Whelan N. W., 2014 (36)  | Engaging parents and schools improves uptake of the human papillomavirus (HPV) vaccine: examining the role of the public health nurse                     | CS  | Registries | 3219 | Nr    | A/P | Adolescents', parents', and schools' engagement by a nurse team specialized in multicomponent school-based vaccination program lead by Public Health Nurses | Multicomponent        | First dose; all-doses completion; | Y<br>Sending a remind to parents and teachers' engagement increased first dose uptake with an OR ranging from 1.63 (95% CI 1.09–2.42) to 3.23 (95% CI 7.04–1.48) but not all doses completion (OR 0.56; 95%CI 0.38–0.83). PHN led to increase all doses completion with an OR of 1.65 (95% CI 1.07–2.55) |
| Winer R. L., 2016 (37)   | A cluster-randomized trial to evaluate a mother-daughter dyadic educational intervention for increasing HPV vaccination coverage in American Indian girls | RCT | Registries | 97   | 11–12 | A/P | Dinner with power point presentation on HPV and information brochure                                                                                        | Education/Information | First dose; All-doses completion  | Y<br>First dose uptake RR = 1.8 (95% CI 0.8–4.4); All doses completion RR = 3.0 (95% CI 0.8–10.8)                                                                                                                                                                                                        |

|                            |                                                                                                                                        |     |            |        |       |     |                                                                              |                                                                                              |                                              |                                  |                                                                                                                                                                                                                  |
|----------------------------|----------------------------------------------------------------------------------------------------------------------------------------|-----|------------|--------|-------|-----|------------------------------------------------------------------------------|----------------------------------------------------------------------------------------------|----------------------------------------------|----------------------------------|------------------------------------------------------------------------------------------------------------------------------------------------------------------------------------------------------------------|
| Zimmerman R. K., 2017 (38) | Improving adolescent HPV vaccination in a randomized controlled cluster trial using the 4 Pillars (TM) practice Transformation Program | RCT | Registries | 10,861 | 11–17 | A/P | Four-Pillar Transformation Program (TP) Practice:                            |                                                                                              |                                              | First dose; All-doses completion | Y<br>First dose uptake increased from 52.5% to 62.7% (+10.2PP) in the intervention group and from 61.8% to 69.1%, (+7.3PP) in control group.<br>All-doses completion increased respectively of 12.8PP and 12.7PP |
|                            |                                                                                                                                        |     |            |        |       |     | Pillar 1 - Convenient vaccination service;                                   | Pillar 2 - Communication with parents on importance of the vaccination and its availability; | Pillar 3 - Facilitating appointments system; |                                  |                                                                                                                                                                                                                  |
|                            |                                                                                                                                        |     |            |        |       |     | Pillar 4 - Increasing the motivation using Champion one-on-one communication | Multicomponent                                                                               |                                              |                                  |                                                                                                                                                                                                                  |

Abbreviations: Y Yes; N No; Nr Not reported; Ns Not significant; F females; M males; A/P Adolescents/Parents; HCPs HealthCare Providers; RCT Randomized Controlled Trial; CS Cohort Study; C-S Cross-Sectional Study; Q-E Quasi-Experimental; HPVv HPV vaccination; AFIX Assessment, Feedback, Incentives and eXchange; HBM Health Belief Model; HIT Health Information Technology; MO Missing Opportunities; PP percentage point; IIS Immunization Information System; SUB subsidy, FT free ticket, DM direct mail, RC recall; rNEM revised Network Episode Mode
